# Supplementary material
Source: PubMed Central journal article supplement (PMC4719639)
Supplement: JVI.02545-15_zjv999091270so1.pdf [file JVI.02545-15_zjv999091270so1.pdf]

## **SUPPLEMENTAL MATERIAL**

**Movie S1** Movie of live-cell imaging using EGFP-TAF-I $\beta$  and PML-mCherry. U2OS/EGFP-TAF-I $\beta$  cells were first transiently transfected with the expression vector for mCherry-tagged PML and then either mock-infected (top row) or infected with Ad5-GFP (bottom row) for live-cell imaging. Frames were taken every 3 sec for 2 (for mock) or 3 min (for infected cells), and EGFP (green), mCherry (magenta) and merged images are shown in the left, middle, and right columns, respectively. Note that for the mock-infected cell, the last 20 frames are blank.

**Movie S2** Movie of live-cell imaging using EGFP-TAF-I $\beta$  and mCherry-Daxx. Live-cell imaging was carried out as described for Movie S1, but using mCherry-Daxx instead.

**Movie S3** Movie of live-cell imaging using mCherry-TAF-I $\beta$  and EGFP-ATR $X$ . U2OS/mCherry-TAF-I $\beta$  cells were first transiently transfected with the expression vector for EGFP-ATR $X$ , and live-cell imaging was carried out as described for Movie S1.

**Movie S4** Movie of live-cell imaging using EGFP-TAF-I $\beta$ , mCherry-Daxx, and Ad5-GFP-M1. Live-cell imaging was carried out as described for Movie S2, but using Ad5-GFP-M1 instead.
